# Supplementary material for: Endoscopic Sleeve Gastroplasty (ESG) Is a Reproducible and Effective Endoscopic Bariatric Therapy Suitable for Widespread Clinical Adoption: a Large, International Multicenter Study
Source: Springer Nature journal article supplement (doi:10.1007/s11695-018-3135-x), 2018-02-15
Supplement: MOESM1 [file 15468258]

**Supplementary Table 1. Multi-variate associations between weight loss parameters and potential predictors at 1, 3, and 6 months post-ESG**

|  | 1 month | | | | | 3 months | | | | | 6 months | | | | |
| --- | --- | --- | --- | --- | --- | --- | --- | --- | --- | --- | --- | --- | --- | --- | --- |
| Δ Weight (kg) | Unstandardized Coefficients | | Standardized Coefficients | t | Sig. | Unstandardized Coefficients | | Standardized Coefficients | t | Sig. | Unstandardized Coefficients | | Standardized Coefficients | t | Sig. |
|  | B | Std. Error | Beta |  |  | B | Std. Error | Beta |  |  | B | Std. Error | Beta |  |  |
| (Constant) | 2.5 | 2.6 |  | 0.9 | 0.349 | 4 | 4.4 |  | 0.9 | 0.366 | -18.6 | 7.5 |  | -2.5 | 0.017 |
| Centre | -1.4 | 0.7 | -0.2 | -2 | 0.054 | -0.2 | 1.1 | 0 | -0.1 | 0.885 | 2.2 | 2.5 | 0.1 | 0.9 | 0.382 |
| Age (by year) | 0 | 0 | -0.1 | -1.2 | 0.233 | 0 | 0.1 | 0 | -0.4 | 0.687 | 0 | 0.1 | 0 | 0.4 | 0.704 |
| Gender (Male) | 3.9 | 0.8 | 0.4 | 4.7 | 0 | 4.1 | 1.5 | 0.3 | 2.8 | 0.007 | 1.5 | 2.5 | 0.1 | 0.6 | 0.561 |
| Baseline BMI (by kg/m2) | 0.2 | 0.1 | 0.3 | 3.8 | 0 | 0.3 | 0.1 | 0.3 | 3.3 | 0.001 | 1 | 0.2 | 0.7 | 6.5 | 0 |
| ORCD (Yes) | -1.7 | 0.8 | -0.2 | -2.2 | 0.03 | -1.7 | 1.3 | -0.1 | -1.3 | 0.198 | -1.8 | 2.4 | -0.1 | -0.7 | 0.461 |
| Suture (by number) | 0.1 | 0.2 | 0 | 0.4 | 0.681 | -0.2 | 0.4 | -0.1 | -0.4 | 0.656 | -0.4 | 0.7 | -0.1 | -0.6 | 0.531 |
| Bariatric history (Yes) | -4 | 1.3 | -0.3 | -2.9 | 0.004 | -4.8 | 2 | -0.3 | -2.5 | 0.017 | -6.6 | 3 | -0.2 | -2.2 | 0.036 |
| Δ BMI (kg/m2) | Unstandardized Coefficients | | Standardized Coefficients | t | Sig. | Unstandardized Coefficients | | Standardized Coefficients | t | Sig. | Unstandardized Coefficients | | Standardized Coefficients | t | Sig. |
|  | B | Std. Error | Beta |  |  | B | Std. Error | Beta |  |  | B | Std. Error | Beta |  |  |
| (Constant) | 2.1 | 3.1 |  | 0.7 | 0.501 | 2.1 | 1.5 |  | 1.4 | 0.159 | -4.1 | 2.4 |  | -1.7 | 0.092 |
| Centre (US/AUS) | -0.3 | 0.8 | -0.1 | -0.4 | 0.693 | -0.1 | 0.4 | 0 | -0.2 | 0.82 | 0.8 | 0.8 | 0.2 | 1 | 0.311 |
| Age (by year) | -0.1 | 0 | -0.2 | -1.4 | 0.157 | 0 | 0 | 0 | -0.3 | 0.756 | 0 | 0 | 0 | 0.2 | 0.846 |
| Gender (Male) | 1.8 | 1 | 0.2 | 1.9 | 0.067 | 0.7 | 0.5 | 0.2 | 1.4 | 0.178 | -0.1 | 0.8 | 0 | -0.1 | 0.911 |
| Baseline BMI (by kg/m2) | 0.1 | 0.1 | 0.1 | 0.9 | 0.368 | 0.1 | 0 | 0.3 | 3.1 | 0.003 | 0.3 | 0 | 0.7 | 6.1 | 0 |
| ORCD (Yes) | -0.1 | 0.9 | 0 | -0.1 | 0.92 | -0.7 | 0.4 | -0.2 | -1.5 | 0.137 | -0.6 | 0.8 | -0.1 | -0.9 | 0.394 |
| Suture (by number) | 0.2 | 0.3 | 0.1 | 0.6 | 0.537 | -0.1 | 0.1 | -0.1 | -0.5 | 0.625 | -0.1 | 0.2 | -0.1 | -0.7 | 0.48 |
| Bariatric history (Yes) | -1.5 | 1.6 | -0.1 | -1 | 0.337 | -1.8 | 0.7 | -0.3 | -2.7 | 0.008 | -2.2 | 1 | -0.3 | -2.3 | 0.026 |
| %TBWL | Unstandardized Coefficients | | Standardized Coefficients | t | Sig. | Unstandardized Coefficients | | Standardized Coefficients | t | Sig. | Unstandardized Coefficients | | Standardized Coefficients | t | Sig. |
|  | B | Std. Error | Beta |  |  | B | Std. Error | Beta |  |  | B | Std. Error | Beta |  |  |
| (Constant) | 10.1 | 2.3 |  | 4.3 | 0 | 15.2 | 3.5 |  | 4.4 | 0 | 7.7 | 5.7 |  | 1.4 | 0.182 |
| Centre | -1.3 | 0.6 | -0.3 | -2.2 | 0.031 | -0.3 | 0.9 | 0 | -0.3 | 0.739 | 1.3 | 1.9 | 0.1 | 0.7 | 0.51 |
| Age (by year) | 0 | 0 | -0.1 | -1 | 0.312 | 0 | 0 | -0.1 | -0.5 | 0.647 | 0 | 0.1 | 0.1 | 0.4 | 0.69 |
| Gender (Male) | 1.8 | 0.7 | 0.3 | 2.4 | 0.018 | 1.2 | 1.2 | 0.1 | 1 | 0.32 | -0.6 | 1.9 | 0 | -0.3 | 0.765 |
| Baseline BMI (by kg/m2) | 0 | 0.1 | 0 | -0.1 | 0.945 | 0 | 0.1 | 0 | -0.2 | 0.87 | 0.3 | 0.1 | 0.3 | 2.3 | 0.025 |
| ORCD (Yes) | -1.3 | 0.7 | -0.2 | -1.9 | 0.066 | -1.4 | 1 | -0.2 | -1.3 | 0.185 | -2 | 1.8 | -0.2 | -1.1 | 0.273 |
| Suture (by number) | 0.1 | 0.2 | 0.1 | 0.5 | 0.644 | -0.1 | 0.3 | -0.1 | -0.4 | 0.699 | -0.3 | 0.5 | -0.1 | -0.6 | 0.543 |
| Bariatric history (Yes) | -3.6 | 1.2 | -0.3 | -3 | 0.004 | -4.8 | 1.6 | -0.4 | -3.1 | 0.003 | -6.4 | 2.3 | -0.4 | -2.8 | 0.008 |
| %EWL | Unstandardized Coefficients | | Standardized Coefficients | t | Sig. | Unstandardized Coefficients | | Standardized Coefficients | t | Sig. | Unstandardized Coefficients | | Standardized Coefficients | t | Sig. |
|  | B | Std. Error | Beta |  |  | B | Std. Error | Beta |  |  | B | Std. Error | Beta |  |  |
| (Constant) | 76.8 | 8 |  | 9.6 | 0 | 107.2 | 11 |  | 9.7 | 0 | 106.5 | 19.4 |  | 5.5 | 0 |
| Centre | -2.8 | 2 | -0.2 | -1.4 | 0.177 | 1.9 | 2.9 | 0.1 | 0.7 | 0.501 | 8.5 | 6.6 | 0.2 | 1.3 | 0.2 |
| Age (by year) | -0.1 | 0.1 | -0.1 | -1 | 0.324 | -0.1 | 0.1 | -0.1 | -0.7 | 0.479 | 0.2 | 0.3 | 0.1 | 0.6 | 0.555 |
| Gender (Male) | 3.3 | 2.5 | 0.1 | 1.3 | 0.193 | 1.3 | 3.7 | 0 | 0.4 | 0.726 | -1.7 | 6.5 | 0 | -0.3 | 0.799 |
| Baseline BMI (by kg/m2) | -1.1 | 0.2 | -0.6 | -6.2 | 0 | -1.5 | 0.2 | -0.6 | -6.4 | 0 | -1.2 | 0.4 | -0.4 | -3 | 0.005 |
| ORCD (Yes) | -3.7 | 2.3 | -0.2 | -1.6 | 0.112 | -4.1 | 3.3 | -0.1 | -1.3 | 0.215 | -7.4 | 6.2 | -0.2 | -1.2 | 0.239 |
| Suture (by number) | -0.1 | 0.7 | 0 | -0.1 | 0.888 | -0.7 | 1 | -0.1 | -0.7 | 0.478 | -2.1 | 1.7 | -0.2 | -1.3 | 0.216 |
| Bariatric history (Yes) | -10.7 | 4.1 | -0.2 | -2.6 | 0.011 | -14 | 4.9 | -0.3 | -2.9 | 0.006 | -20.7 | 7.9 | -0.3 | -2.6 | 0.012 |

**Supplementary Table 2. Weight loss outcomes of patients adjusted for sex and previous balloon experience**

|  |  | **Un-adjusted** |  |  |  |  |  |
| --- | --- | --- | --- | --- | --- | --- | --- |
|  |  | **No previous balloon (N=102)** | **Previous balloon (N=10)** | **P-value#** | **Female (N=77)** | **Male (N=35)** | **P-value#** |
| **Δ Weight (kg)** | **1 month** | 9.3±4.7 | 6±1.8 | <0.001 | 7.8±4.2 | 11.6±4.4 | <0.001 |
|  | **3 months** | 13.5±6.4 | 8.2±3.1 | <0.001 | 11.3±4.7 | 16.2±8.1 | <0.001 |
|  | **6 months** | 17.6±11 | 9.7±4.1 | <0.001 | 14.3±6.3 | 20.3±15.4 | ns |
|  | **P-value^** | <0.001 | <0.001 |  |  |  |  |
| **Δ BMI (kg/m2)** | **1 month** | 3.6±4 | 2.1±0.6 | <0.001 | 2.8±1.2 | 4.8±6.4 | <0.001 |
|  | **3 months** | 4.7±2 | 2.9±1.1 | <0.001 | 4.2±1.8 | 5.1±2.4 | ns |
|  | **6 months** | 6±3.3 | 3.5±1.6 | <0.001 | 5.2±2.3 | 6.4±4.5 | ns |
|  | **P-value^** | <0.001 | <0.001 |  |  |  |  |
| **%TBWL** | **1 month** | 8.6±4.2 | 5.7±1.8 | <0.001 | 8±4.5 | 9.2±3 | ns |
|  | **3 months** | 12.4±4.4 | 8.1±3.1 | <0.001 | 11.6±4.3 | 12.5±5 | ns |
|  | **6 months** | 15.9±5.9 | 9.3±4 | <0.001 | 14.8±5.4 | 15.1±7.5 | ns |
|  | **P-value^** | <0.001 | 0±0 |  |  |  |  |
| **%EWL** | **1 month** | 28.8±18.7 | 20.6±10.5 | <0.001 | 28.9±21.3 | 26.8±9.9 | ns |
|  | **3 months** | 41.2±17 | 30.7±17.4 | <0.001 | 41.9±17.3 | 35.8±16.9 | ns |
|  | **6 months** | 53.5±21.6 | 32.9±19.3 | <0.001 | 53.7±22 | 43.9±22.3 | ns |
|  | **P-value^** | <0.001 | <0.001 |  | <0.001 | <0.001 |  |

| **Footnote:** |
| --- |
| ^ Repeat-measurement analysis |
| # ANOVA tests, adjustment not performed because of inadequate sample size |
| ns: not statistically significant |
| Δ Weight: change of weight from pre-procedure |
| Δ BMI: change of BMI from pre-procedure |
| %TBWL: total body weight loss (%) |
| %EWL: excess weight loss (%) |


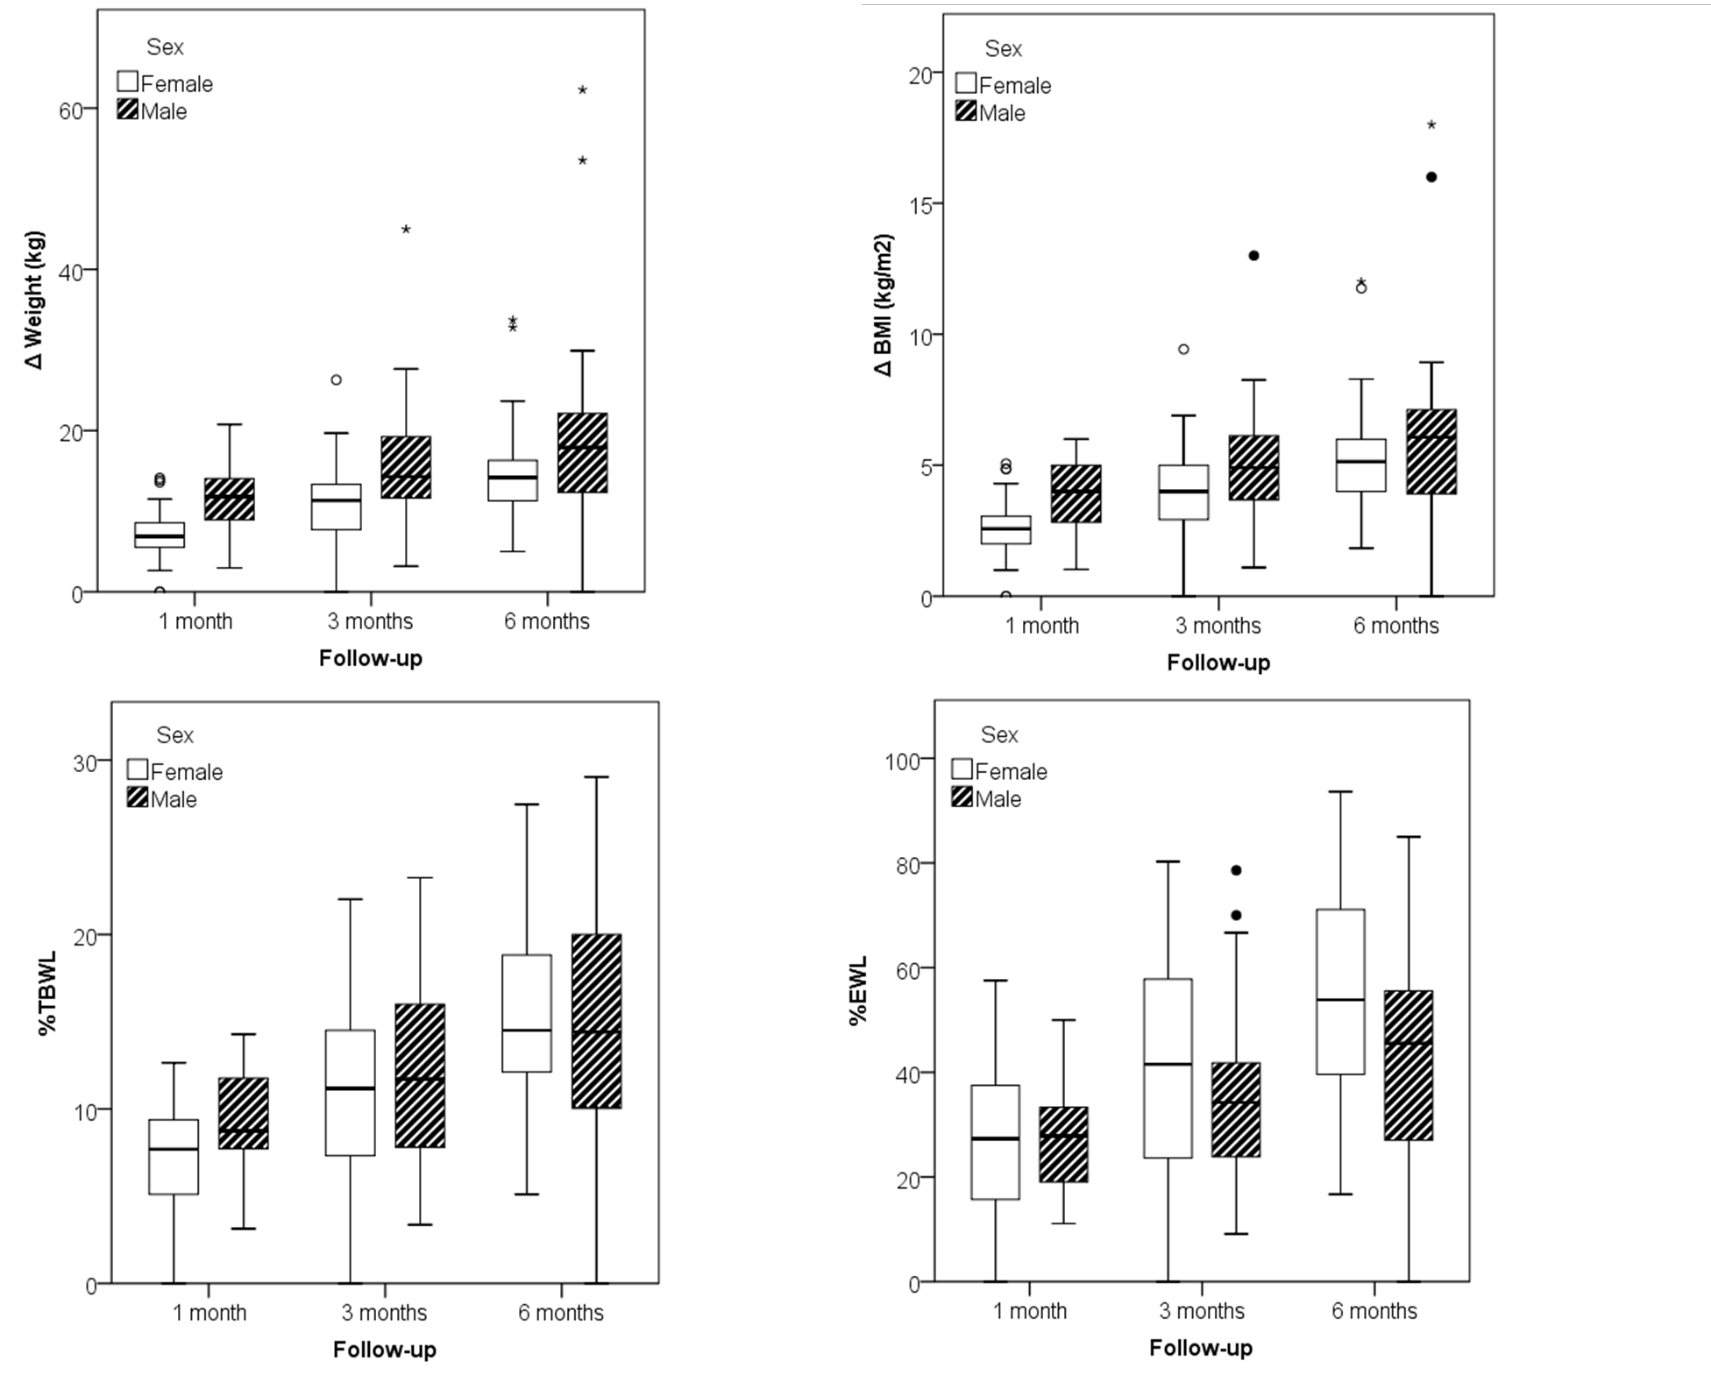


**Supplementary Figure 1**. Graphical depictions of a. ΔWeight, b. ΔBMI, c. %TBWL, d. %EWL at 1, 3 and 6 months post-ESG, categorized by sexpre

Footnote:

Figures included all data points. Outliers are defined as data points that is located 1.5 times outside the interquartile range.

* indicates an outlier

º indicates two outliers

• indicates three outliers


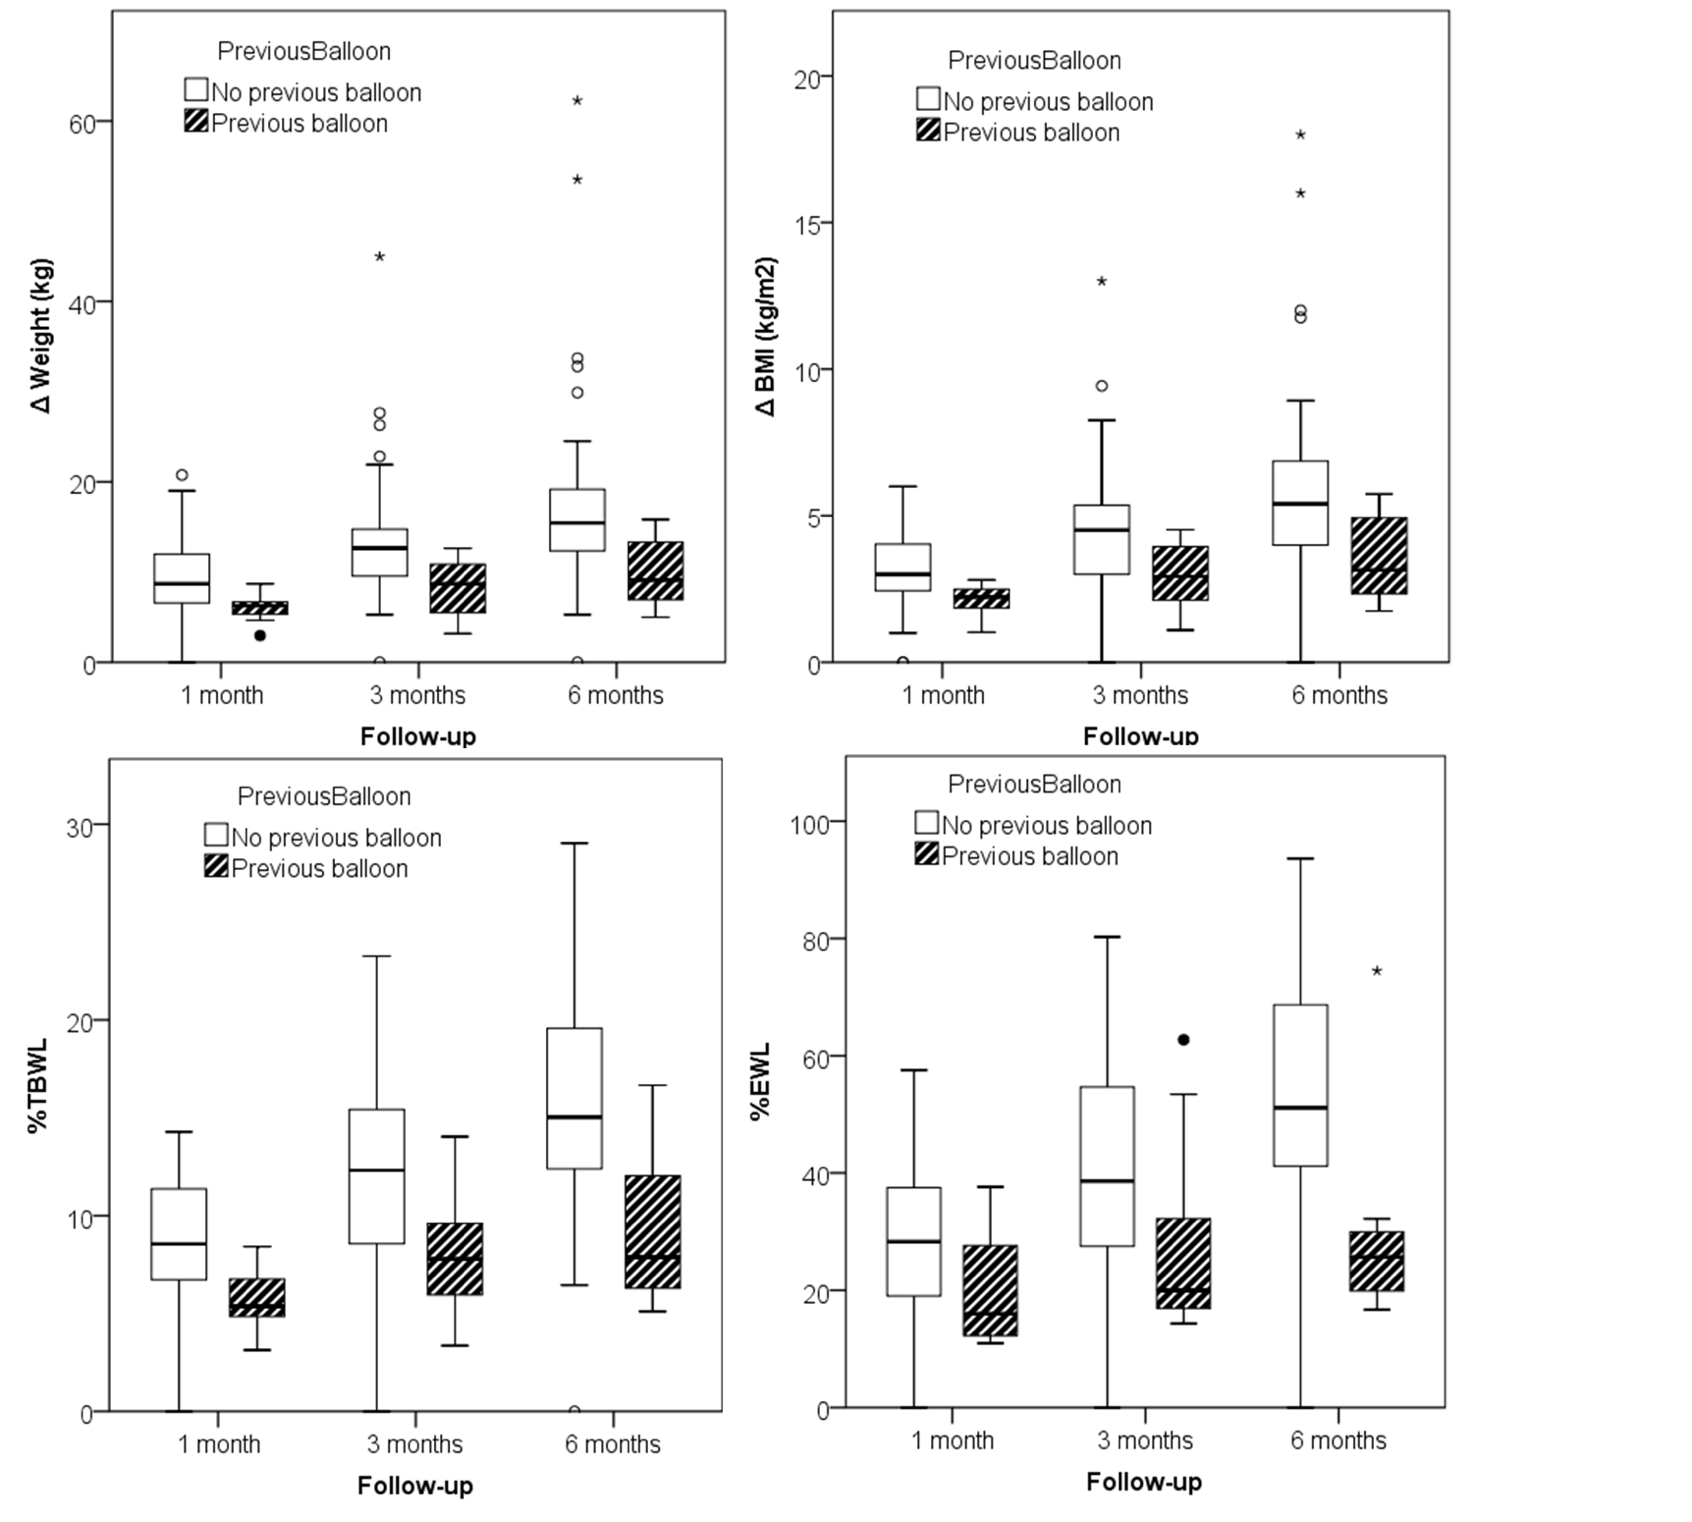


**Supplementary Figure 2.** Graphical depictions of a. ΔWeight, b. ΔBMI, c. %TBWL, d. %EWL at 1, 3 and 6 months post-ESG, categorized by presence or absence of previous bariatric therapy via intragastric balloon

Footnote:

Figures included all data points. Outliers are defined as data points that is located 1.5 times outside the interquartile range.

* indicates an outlier

º indicates two outliers

• indicates three outliers
